# Supplementary material for: CSConv2d: A 2-D Structural Convolution Neural Network with a Channel and Spatial Attention Mechanism for Protein-Ligand Binding Affinity Prediction
Source: MDPI journal article supplement (doi:10.3390/biom11050643), 2021-04-27
Supplement: s1 [file s1]

## Supplementary Materials

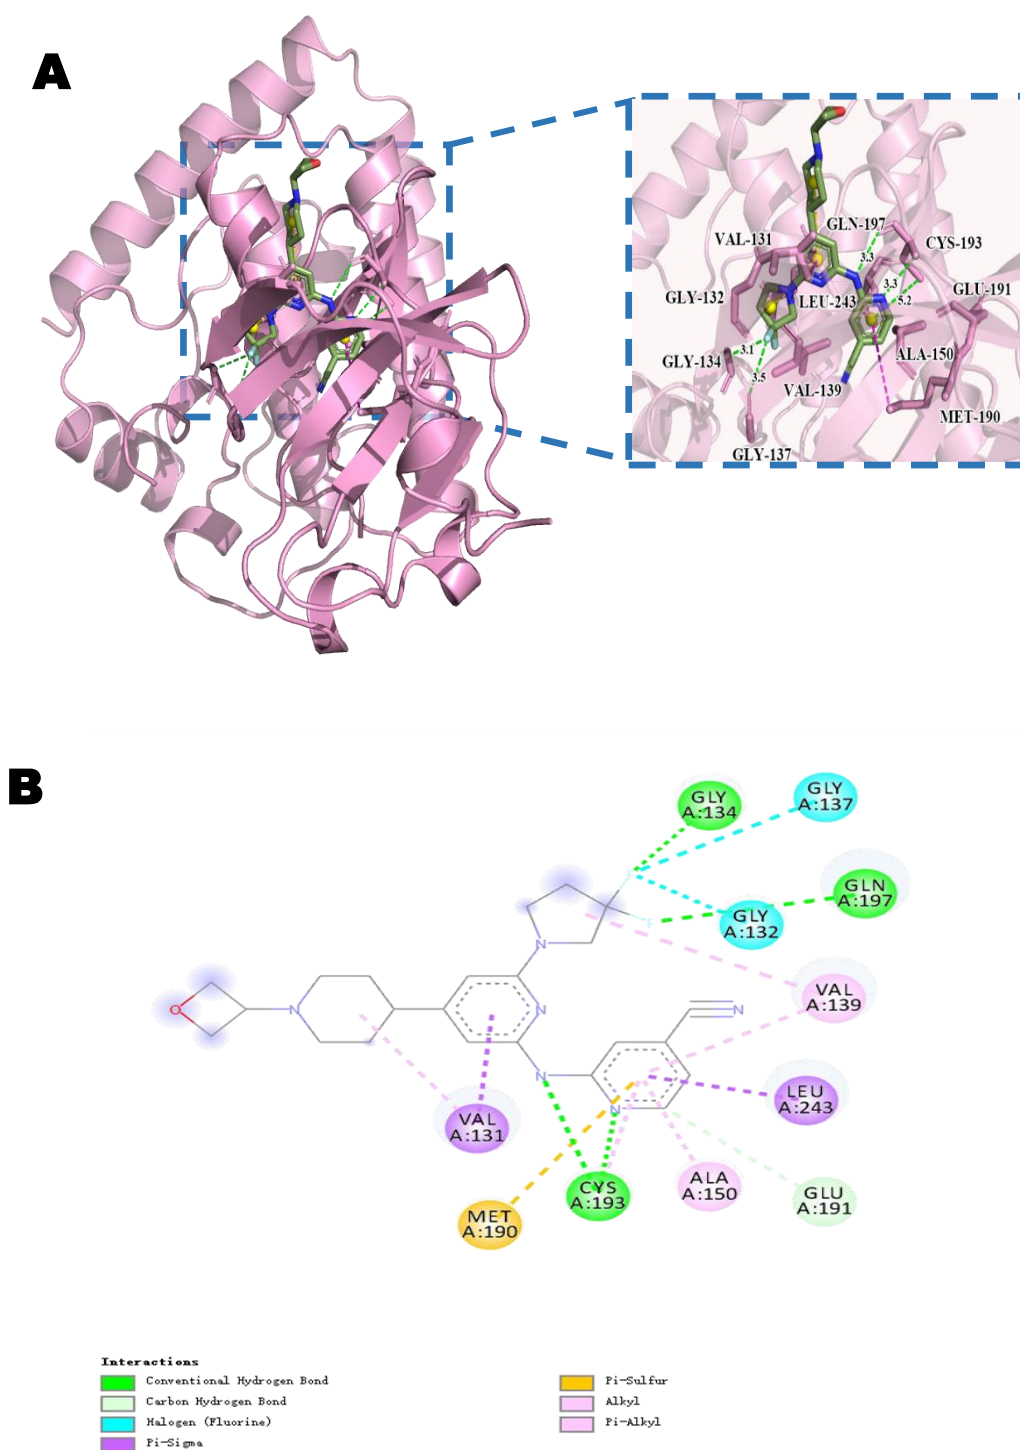

**Figure S1.** The interaction diagram between the DLK in complex with inhibitor 2-((6-(3,3-difluoropyrrolidin-1-yl)-4-(1-(oxetan-3-yl)piperidin-4-yl)pyridin-2-yl)amino)isonicotinonitrile (PDB ID: 5ceo) and 2-[[6-[3,3-bis(fluoranyl)pyrrolidin-1-yl]-4-[1-(oxetan-3-yl)piperidin-4-yl]pyridin-2-yl]amino]pyridine-4-carbonitrile (Chemical ID: 50D). (A) Molecular docking between the protein (PDB IDWx: 5ceo) and compound (Chemical ID: 50D). (B) Local two

dimensional display of the interaction diagram between the protein (PDB ID: 5ceo) and compound (Chemical ID: 50D).

**Table S1.** Results of molecular (kinase inhibitor) docking and predicted result by CSConv2d and DEEPScreen.

| Target | Drug ID | Affinity<br>(kcal/mol) | RMSD   | Pred<br>(CSConv2d) | Pred<br>(DEEPScreen) | Label |
|--------|---------|------------------------|--------|--------------------|----------------------|-------|
| mTOR   | DB00877 | -18.0                  | 0.3764 | 1                  | 1                    | 1     |
|        | DB11651 | -12.1                  | -      | 1                  | 1                    | 1     |
|        | DB13109 | -11.0                  | -      | 1                  | 0                    | 1     |
|        | DB12986 | -8.2                   | -      | 1                  | 0                    | 1     |
|        | DB12400 | -7.6                   | -      | 1                  | 0                    | 1     |
| VEGFR  | DB07334 | -9.1                   | 1.3344 | 1                  | 0                    | 1     |
|        | DB06595 | -10.3                  | -      | 1                  | 1                    | 1     |
|        | DB11977 | -9.3                   | -      | 0                  | 1                    | 1     |
|        | DB14765 | -8.0                   | -      | 1                  | 0                    | 1     |
|        | DB05608 | -7.9                   | -      | 1                  | 0                    | 1     |
| JAK    | DB08895 | -8.9                   | 1.2841 | 1                  | 1                    | 1     |
|        | DB11763 | -8.7                   | -      | 0                  | 0                    | 1     |
|        | DB12154 | -8.4                   | -      | 1                  | 1                    | 1     |
|        | DB11817 | -7.5                   | -      | 0                  | 1                    | 1     |
|        | DB14973 | -6.8                   | -      | 1                  | 0                    | 1     |
